# Supplementary material for: Hydrophobic Recovery of PDMS Surfaces in Contact with Hydrophilic Entities: Relevance to Biomedical Devices
Source: MDPI journal article supplement (doi:10.3390/ma15062313), 2022-03-21
Supplement: s1 [file s1]

# Hydrophobic recovery of PDMS surfaces in the contact with hydrophilic entities: relevance to biomedical applications

Tomoo Tsuzuki, Karine Baassiri, Zahra Mahmoudi, Ayyappasamy Sudalaiyadum Perumal, Kavya Rajendran, Gala Montiel Rubies, Dan V. Nicolau

## Supplementary Information

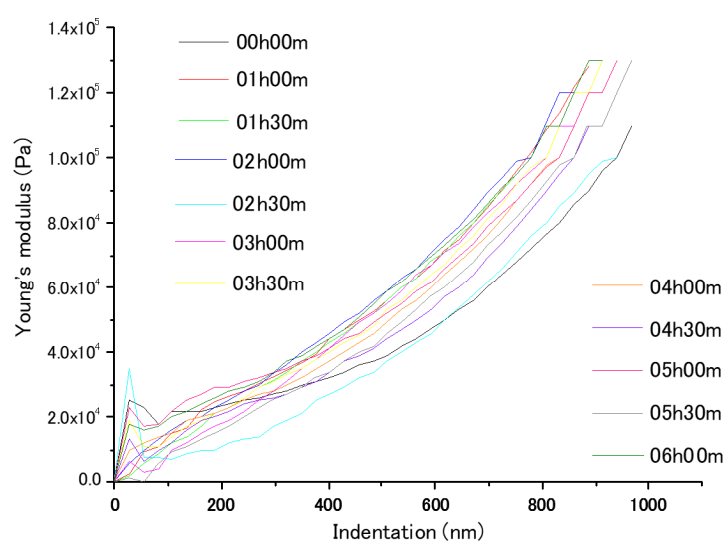

**Figure S1.** Estimated Young's modulus for AFM F-d measurements for various stages of hydrophobic recovery.

**Table S1.** Assignment of the FTIR peaks in Figure 3.

| Peak | IR region (cm <sup>-1</sup> ) | Description                                                                                                                                   |
|------|-------------------------------|-----------------------------------------------------------------------------------------------------------------------------------------------|
| 1    | 785–815                       | –CH <sub>3</sub> rocking and ≡Si–C≡ stretching in ≡Si–CH <sub>3</sub>                                                                         |
| 2    | 825–865                       | ≡Si–O stretching in ≡Si–OH                                                                                                                    |
| 3    | 875–920                       | ≡Si–O stretching in ≡Si–OH                                                                                                                    |
| 4    | 1015–1150                     | In-phase and out-of-phase wagging vibrations of –(CH <sub>2</sub> )– in ≡Si–(CH <sub>2</sub> ) <sub>2</sub> –Si≡ and ≡Si–CH <sub>2</sub> –Si≡ |
| 5    | 1055–1090                     | Asymmetric ≡Si–O–Si≡ stretching in [–(CH <sub>2</sub> ) <sub>2</sub> Si–O–] <sub>x</sub>                                                      |
| 6    | 1100–1170                     | In-phase and out-of-phase wagging vibrations of –(CH <sub>2</sub> )– in ≡Si–(CH <sub>2</sub> ) <sub>2</sub> –Si≡                              |
| 7    | 1245–1270                     | Symmetric –CH <sub>3</sub> deformation in ≡Si–CH <sub>3</sub>                                                                                 |
| 8    | 2950–2970                     | Asymmetric –CH <sub>3</sub> stretching in ≡Si–CH <sub>3</sub>                                                                                 |
| 9    | 3050–3700                     | –OH stretching in ≡Si–OH, possibly also in ≡C–OH (3610–3640 cm <sup>-1</sup> )                                                                |

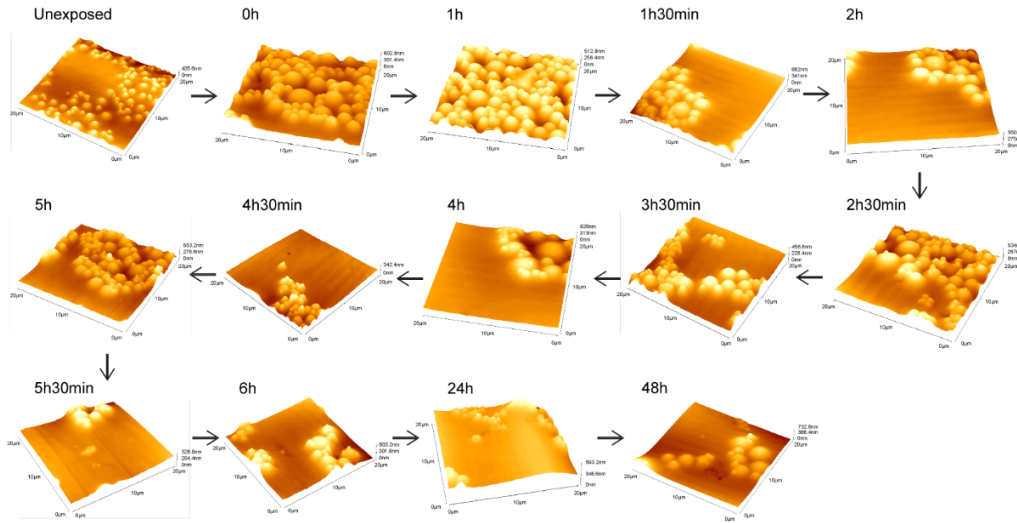

**Figure S2.** Sequence of AFM scans of the topography of PDMS embedded with beads, unexposed, immediately after UV exposure, and at various stages of hydrophobic recovery.

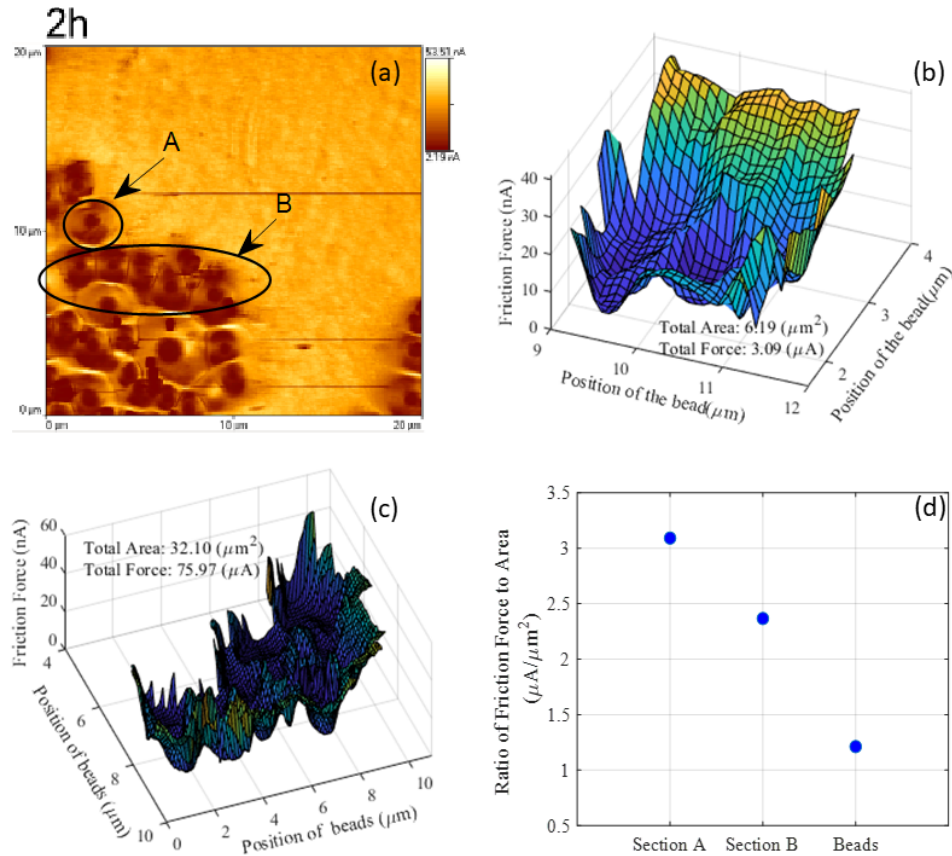

**Figure S3.** (a) AFM lateral force scans of PDMS surfaces with embedded hydrophilic beads, (b, c) friction forces on the beads and surrounding area in A and B section (d) ratio of friction forces to the area of beads and their vicinity.
